# Supplementary material
Source: MDPI journal article supplement (https://www.mdpi.com/2075-4655/7/2/11)
Supplement: s1 [file s1]

# Graft-derived cell-free DNA quantification following liver transplantation using tissue-specific DNA methylation and donor-specific genotyping: an orthogonal comparison study

Cox DRA, McClure T, Zhang F, Wong BKL, Testro A, Goh SK, Muralidharan V, Dobrovic A.

## Supplementary Data

**Supplemental Table S1.** ‘STROBE-ME’ checklist for reporting observational studies involving molecular biomarkers.

|                                       | Item No | STROBE Recommendation                                                                                                                                                                                                                                                                                                                                                                                                         | STROBE-ME addition                                                                                                                                                                                                           | Page |
|---------------------------------------|---------|-------------------------------------------------------------------------------------------------------------------------------------------------------------------------------------------------------------------------------------------------------------------------------------------------------------------------------------------------------------------------------------------------------------------------------|------------------------------------------------------------------------------------------------------------------------------------------------------------------------------------------------------------------------------|------|
| Title and abstract                    | 1       | (a) Indicate the study's design with a commonly used term in the title or the abstract                                                                                                                                                                                                                                                                                                                                        | ME-1 State the use of specific biomarker(s) in the title and/or in the abstract if they contribute substantially to the findings                                                                                             | 1    |
|                                       |         | (b) Provide in the abstract an informative and balanced summary of what was done and what was found                                                                                                                                                                                                                                                                                                                           |                                                                                                                                                                                                                              | 3    |
| Introduction                          |         |                                                                                                                                                                                                                                                                                                                                                                                                                               |                                                                                                                                                                                                                              |      |
| Background/rationale                  | 2       | Explain the scientific background and rationale for the investigation being reported                                                                                                                                                                                                                                                                                                                                          | ME-2 Explain in the scientific background of the paper how/why the specific biomarker(s) have been chosen, potentially among many others (e.g. others are studied but reported elsewhere or not studied at all)              | 5-6  |
| Objectives                            | 3       | State specific objectives, including any prespecified hypotheses                                                                                                                                                                                                                                                                                                                                                              | ME-3 A <i>priori</i> hypothesis: if one or more biomarkers are used as proxy measures, state the <i>a priori</i> hypothesis on the expected values of the biomarker(s)                                                       | 6    |
| Methods                               |         |                                                                                                                                                                                                                                                                                                                                                                                                                               |                                                                                                                                                                                                                              |      |
| Study design                          | 4       | Present key elements of study design early in the paper                                                                                                                                                                                                                                                                                                                                                                       | ME-4 Describe the special study designs for molecular epidemiology (in particular, nested case/control and case/cohort) and how they were implemented                                                                        | 6    |
| Biological sample collection          |         | -                                                                                                                                                                                                                                                                                                                                                                                                                             | ME-4.1 Report on the setting of the biological sample collection; amount of sample; nature of collecting procedures; participant conditions; time between sample collection and relevant clinical or physiological endpoints | 7,9  |
| Biological sample processing          |         | -                                                                                                                                                                                                                                                                                                                                                                                                                             | ME-4.2 Describe sample processing (centrifugation, timing, additives, etc.)                                                                                                                                                  | 7    |
| Biological sample storage             |         | -                                                                                                                                                                                                                                                                                                                                                                                                                             | ME-4.3 Describe sample storage until biomarker analysis (storage, thawing, manipulation, etc.)                                                                                                                               | 7    |
| Biomarker biochemical characteristics |         | -                                                                                                                                                                                                                                                                                                                                                                                                                             | ME-4.4 Report the half-life of the biomarker and chemical and physical characteristics (e.g. solubility)                                                                                                                     | n/a  |
| Setting                               | 5       | Describe the setting, locations, and relevant dates, including periods of recruitment, exposure, follow-up, and data collection                                                                                                                                                                                                                                                                                               |                                                                                                                                                                                                                              | 9    |
| Participants                          | 6       | (a) <i>Cohort study</i> —Give the eligibility criteria, and the sources and methods of selection of participants. Describe methods of follow-up<br><i>Case-control study</i> —Give the eligibility criteria, and the sources and methods of case ascertainment and control selection. Give the rationale for the choice of cases and controls<br><i>Cross-sectional study</i> —Give the eligibility criteria, and the sources | ME-6 Report any habit, clinical condition, physiological factor or working or living condition that might affect the characteristics or concentrations of the biomarker                                                      | 6-7  |

|                                                                      |    |                                                                                                                                                                                                                                                                                                                                                                                                                                                                                                                                                                   |                                                                                                                                                                                                                     |                                             |
|----------------------------------------------------------------------|----|-------------------------------------------------------------------------------------------------------------------------------------------------------------------------------------------------------------------------------------------------------------------------------------------------------------------------------------------------------------------------------------------------------------------------------------------------------------------------------------------------------------------------------------------------------------------|---------------------------------------------------------------------------------------------------------------------------------------------------------------------------------------------------------------------|---------------------------------------------|
|                                                                      |    | and methods of selection of participants                                                                                                                                                                                                                                                                                                                                                                                                                                                                                                                          |                                                                                                                                                                                                                     |                                             |
|                                                                      |    | (b) <i>Cohort study</i> —For matched studies, give matching criteria and number of exposed and unexposed<br><i>Case-control study</i> —For matched studies, give matching criteria and the number of controls per case                                                                                                                                                                                                                                                                                                                                            |                                                                                                                                                                                                                     |                                             |
| Variables                                                            | 7  | Clearly define all outcomes, exposures, predictors, potential confounders, and effect modifiers. Give diagnostic criteria, if applicable                                                                                                                                                                                                                                                                                                                                                                                                                          |                                                                                                                                                                                                                     | 10                                          |
| Data sources/<br>measurement                                         | 8  | For each variable of interest, give sources of data and details of methods of assessment (measurement). Describe comparability of assessment methods if there is more than one group                                                                                                                                                                                                                                                                                                                                                                              | ME-8 Laboratory methods: report type of assay used, detection limit, quantity of biological sample used, outliers, timing in the assay procedures (when applicable) and calibration procedures or any standard used | 8-9                                         |
| Bias                                                                 | 9  | Describe any efforts to address potential sources of bias                                                                                                                                                                                                                                                                                                                                                                                                                                                                                                         |                                                                                                                                                                                                                     | 9                                           |
| Study size                                                           | 10 | Explain how the study size was arrived at                                                                                                                                                                                                                                                                                                                                                                                                                                                                                                                         |                                                                                                                                                                                                                     | Sample size determined by caseload and time |
| Quantitative variables                                               | 11 | Explain how quantitative variables were handled in the analyses. If applicable, describe which groupings were chosen and why                                                                                                                                                                                                                                                                                                                                                                                                                                      |                                                                                                                                                                                                                     | 10,11                                       |
| Statistical methods                                                  | 12 | (a) Describe all statistical methods, including those used to control for confounding<br>(b) Describe any methods used to examine subgroups and interactions<br>(c) Explain how missing data were addressed<br>(d) <i>Cohort study</i> —If applicable, explain how loss to follow-up was addressed<br><i>Case-control study</i> —If applicable, explain how matching of cases and controls was addressed<br><i>Cross-sectional study</i> —If applicable, describe analytical methods taking account of sampling strategy<br>(e) Describe any sensitivity analyses | ME-12 Describe how biomarkers were introduced into statistical models                                                                                                                                               | 10                                          |
| Validity/reliability of measurement and internal/external validation |    | -                                                                                                                                                                                                                                                                                                                                                                                                                                                                                                                                                                 | ME-12·1 Report on the validity and reliability of measurement of the biomarker(s) coming from the literature and any internal or external validation used in the study                                              | 18                                          |
| <b>Results</b>                                                       |    |                                                                                                                                                                                                                                                                                                                                                                                                                                                                                                                                                                   |                                                                                                                                                                                                                     |                                             |
| Participants                                                         | 13 | (a) Report the numbers of individuals at each stage of the study – e.g. numbers potentially eligible, examined for eligibility, confirmed eligible, included in the study, completing follow-up and analysed<br>(b) Give reasons for nonparticipation at each stage<br>(c) Consider use of a flow diagram                                                                                                                                                                                                                                                         | ME-13 Give reason for loss of biological samples at each stage                                                                                                                                                      | Table 1                                     |

|                                              |    |                                                                                                                                                                                                                                                                                                                                                                                                                |                                                                                                                                              |         |
|----------------------------------------------|----|----------------------------------------------------------------------------------------------------------------------------------------------------------------------------------------------------------------------------------------------------------------------------------------------------------------------------------------------------------------------------------------------------------------|----------------------------------------------------------------------------------------------------------------------------------------------|---------|
| Descriptive data                             | 14 | (a) Give characteristics of study participants (e.g. demographic, clinical and social) and information on exposures and potential confounders<br>(b) Indicate the number of participants with missing data for each variable of interest<br>(c) Cohort study – Summarize follow-up time (e.g. average and total amount)                                                                                        |                                                                                                                                              | Table 1 |
| <i>Distribution of biomarker measurement</i> |    | -                                                                                                                                                                                                                                                                                                                                                                                                              | ME-14·1 Give the distribution of the biomarker measurement (including mean, median, range and variance)                                      | 11-18   |
| Outcome data                                 | 15 | Cohort study – Report numbers of outcome events or summary measures over time<br>Case-control study – Report numbers in each exposure category or summary measures of exposure<br>Cross-sectional study – Report numbers of outcome events or summary measures                                                                                                                                                 |                                                                                                                                              | 10      |
| Main results                                 | 16 | (a) Give unadjusted estimates and, if applicable, confounder-adjusted estimates and their precision (e.g. 95% confidence interval). Make clear which confounders were adjusted for and why they were included<br>(b) Report category boundaries when continuous variables were categorized<br>(c) If relevant, consider translating estimates of relative risk into absolute risk for a meaningful time period |                                                                                                                                              | 11-18   |
| Other analyses                               | 17 | Report other analyses done – e.g. analyses of subgroups and interactions and sensitivity analyses                                                                                                                                                                                                                                                                                                              |                                                                                                                                              | 18      |
| <b>Discussion</b>                            |    |                                                                                                                                                                                                                                                                                                                                                                                                                |                                                                                                                                              |         |
| Key results                                  | 18 | Summarize key results with reference to study objectives                                                                                                                                                                                                                                                                                                                                                       |                                                                                                                                              | 19-20   |
| Limitations                                  | 19 | Discuss limitations of the study, taking into account sources of potential bias or imprecision. Discuss both direction and magnitude of any potential bias                                                                                                                                                                                                                                                     | ME-19 Describe main limitations in laboratory procedures                                                                                     | 19-24   |
| Interpretation                               | 20 | Give a cautious overall interpretation of results considering objectives, limitations, multiplicity of analyses, results from similar studies and other relevant evidence                                                                                                                                                                                                                                      | ME-20 Give an interpretation of results in terms of <i>a priori</i> biological plausibility                                                  | 19-24   |
| Generalizability                             | 21 | Discuss the generalizability (external validity) of the study results                                                                                                                                                                                                                                                                                                                                          |                                                                                                                                              | 19-24   |
| <b>Other information</b>                     |    |                                                                                                                                                                                                                                                                                                                                                                                                                |                                                                                                                                              |         |
| Funding                                      | 22 | Give the source of funding and the role of the funders for the present study and, if applicable, for the original study on which the present article is based                                                                                                                                                                                                                                                  |                                                                                                                                              | 25      |
| Ethics                                       |    | -                                                                                                                                                                                                                                                                                                                                                                                                              | ME-22·1 Describe informed consent and approval from ethical committee(s). Specify whether samples were anonymous, anonymized or identifiable | 24      |

**Supplemental Table S2.** The targets and primer sets used to genotype donor and recipient buffy coat samples to identify donor-specific DIPs.

| Assay                                            | Target DIP                                          | Primers        | Sequence (5'-3')             |
|--------------------------------------------------|-----------------------------------------------------|----------------|------------------------------|
| <i>BTR02</i> :<br>Genetic polymorphism technique | UCSC hg38 co-ordinates - chr5: 65989041-65989066    | Forward primer | GGTATGTGATAAGGAAGAGCCACT     |
|                                                  |                                                     | Reverse primer | TGCTCATTTTCTGGGTGACACT       |
| <i>BTR03</i> :<br>Genetic polymorphism technique | UCSC hg38 co-ordinates - chr20: 34089222-34089247   | Forward primer | CTCTTGAGATACATAGTTAAAGTAGACA |
|                                                  |                                                     | Reverse primer | CCTGGACACTGAAAACAGGCAAT      |
| <i>BTR06</i> :<br>Genetic polymorphism technique | UCSC hg38 co-ordinates - chr5: 92978840-92978869    | Forward primer | CTCTTGAGATACATAGTTAAAGTAGACA |
|                                                  |                                                     | Reverse primer | CCTGGACACTGAAAACAGGCAAT      |
| <i>BTR08</i> :<br>Genetic polymorphism technique | UCSC hg38 co-ordinates - chr7: 30561807-30561825    | Forward primer | CTCTTGAGATACATAGTTAAAGTAGACA |
|                                                  |                                                     | Reverse primer | CCTGGACACTGAAAACAGGCAAT      |
| <i>BTR09</i> :<br>Genetic polymorphism technique | UCSC hg38 co-ordinates - chr10: 59679173-59679190   | Forward primer | CCAAATTCAAGGAAACGGTGGTTCT    |
|                                                  |                                                     | Reverse primer | TCCGTGCTATTTCTGCTGTTTCA      |
| <i>BTR12</i> :<br>Genetic polymorphism technique | UCSC hg38 co-ordinates - chr12: 119772141-119772155 | Forward primer | AAGCAAAAGACCCAGCAATAGGAG     |
|                                                  |                                                     | Reverse primer | CCCTTGGTGTTTGTCCCACAGA       |
| <i>BTR16</i> :<br>Genetic polymorphism technique | UCSC hg38 co-ordinates - chr6: 48318749-48318835    | Forward primer | AGCACGGATGTGAGGGCATCTT       |
|                                                  |                                                     | Reverse primer | GGCCAGGTCTATGAGGTCATCAA      |
| <i>BTR17</i> :<br>Genetic polymorphism technique | UCSC hg38 co-ordinates - chr5: 131390810-131390944  | Forward primer | TGCTAGCCTCCCTGTTTGTCTT       |
|                                                  |                                                     | Reverse primer | GGTCCGGTGCAACTAAGTAATTCT     |
| <i>BTR18</i> :<br>Genetic polymorphism technique | UCSC hg38 co-ordinates - chr6: 6711451-6711525      | Forward primer | GCTGCCATAACAAAGTACTGCAC      |
|                                                  |                                                     | Reverse primer | ACTTCCAGCCTCCAGCATGGT        |

Key - USCS hg38: University of California Santa Cruz human genome assembly 38.

**Supplemental Table S3.** The reaction mixture and PCR conditions used for HRMA to enable donor and recipient genotyping.

| Reaction Mixture                                                                                                                                                                                                                                                                                                   | PCR and Melting Conditions                                                                                                                                                           |
|--------------------------------------------------------------------------------------------------------------------------------------------------------------------------------------------------------------------------------------------------------------------------------------------------------------------|--------------------------------------------------------------------------------------------------------------------------------------------------------------------------------------|
| <p>Final Volume = 20 µL</p> <p>1 PCR buffer, 2.5 mmol/L MgCl<sup>2</sup>, 200 nmol/L forward primer, 200 nmol/L reverse primer, 20 ng of genomic DNA, 200 µmol/L of dNTPs (deoxynucleotide triphosphates), 5 µmol/L of SYTO 9 (In-vitrogen), 0.5 U of HotStarTaq (Qiagen) DNA polymerase, and PCR-grade water.</p> | <p>1 cycle of 95 °C for 15 min; 55 cycles of 95 °C for 10 s, 60 °C for 20 s, 72 °C for 30 s; 1 cycle of 97 °C for 1 min; and melt from 65 °C to 95 °C, rising 0.2 °C per second.</p> |

**Supplemental Table S4.** Primer panel used for quantitative digital PCR analysis following the DIPs genotyping technique.

| Assay               | Primers        | Sequence<br>(5'-3')          |
|---------------------|----------------|------------------------------|
| <i>BTR02 Long:</i>  | Forward primer | GGTATGTGATAAGGAAGAGCCACT     |
|                     | Reverse primer | GTCGACACTTTCTTCTTCGTTGTGA    |
| <i>BTR02 Short:</i> | Forward primer | GGTATGTGATAAGGAAGAGCCACT     |
|                     | Reverse primer | GTCGACACTTTCTTCTTCGTTGTGA    |
| <i>BTR03 Long:</i>  | Forward primer | GGTATGTGATAAGGAAGAGCCACT     |
|                     | Reverse primer | TGCTCATTTTCTGGGTCGACACT      |
| <i>BTR03 Short:</i> | Forward primer | TAGTTAAAGTAGACACGCCAGAC      |
|                     | Reverse primer | CCTGGACACTGAAAACAGGCAAT      |
| <i>BTR06 Long:</i>  | Forward primer | AAAGGGTTTCCTTGTTTTAGATAAGAGA |
|                     | Reverse primer | ATCCACACACAAAAGCAAAGCCAAAT   |
| <i>BTR06 Short:</i> | Forward primer | AGGGTTTCCTTGTTACTTTCCATGTT   |
|                     | Reverse primer | ATCCACACACAAAAGCAAAGCCAAAT   |
| <i>BTR08 Long:</i>  | Forward primer | AGTTCAGAGAAACATGCATTTCCAGA   |
|                     | Reverse primer | AGACAGTGTTCCCATGCAAGAGT      |
| <i>BTR08 Short:</i> | Forward primer | AGTTCAGAGAAACATGCATTTCCAGA   |
|                     | Reverse primer | AGACAGTGTTCCCATGCAAGAGT      |
| <i>BTR09 Long:</i>  | Forward primer | CAAGGAAACGGTGGTCTGTTTCT      |
|                     | Reverse primer | TCCGTGCTATTTCTGCTGTTTCA      |
| <i>BTR09 Short:</i> | Forward primer | GGAAACGGTGGTCTGTGCTGA        |
|                     | Reverse primer | GACTAGATCTCCGTGCTATTTCCCT    |
| <i>BTR12 Long:</i>  | Forward primer | AAGCAAAAGACCCAGCAATAGGAG     |
|                     | Reverse primer | AAGGGGCGTGCCGTAGTTGATT       |
| <i>BTR12 Short:</i> | Forward primer | AAGCAAAAGACCCAGCAATAGGAG     |
|                     | Reverse primer | TGGTGTTTGTCCACAGAAGGATT      |
| <i>BTR16 Long:</i>  | Forward primer | AGCACGGATGTGAGGGCATCTT       |

|                     |                |                             |
|---------------------|----------------|-----------------------------|
|                     | Reverse primer | CGATGCATCCTATGTGCATGGC      |
| <i>BTR16 Short:</i> | Forward primer | AGCACGGATGTGAGGGCATCTT      |
|                     | Reverse primer | TCATCAAAAGACGATGCATGGCTG    |
| <i>BTR17 Long:</i>  | Forward primer | TGCTAGCCTCCCTGTTTGCCT       |
|                     | Reverse primer | GGTGCAACTAAGTAATTCTTTCCCA   |
| <i>BTR17 Short:</i> | Forward primer | TGCTAGCCTCCCTGTTTGCCT       |
|                     | Reverse primer | TCCGGTGCAACTAAGTAATTCTTTATT |
| <i>BTR18 Long:</i>  | Forward primer | GCTGCCATAACAAAGTACTGCAC     |
|                     | Reverse primer | T GAGACGATGCATCTCTGGTTAAG   |
| <i>BTR18 Short:</i> | Forward primer | GCTGCCATAACAAAGTACTGCAC     |
|                     | Reverse primer | CTCCAGCATGGTGAGACTGGT       |

**Supplemental Table S5.** The reaction mixture and PCR cycling conditions used for quantitative digital PCR analysis in the donor and recipient genotyping technique.

| Reaction Mixture                                                                                                                                             | PCR and Melting Conditions                                                                                                                                 |
|--------------------------------------------------------------------------------------------------------------------------------------------------------------|------------------------------------------------------------------------------------------------------------------------------------------------------------|
| 2 $\mu$ L of eluted plasma cfDNA, 100 nmol/L of the forward and the reverse primer, 11 $\mu$ L QX200 ddPCR EvaGreen Supermix (Bio-Rad), and PCR-grade water. | 1 cycle of 95 °C for 5 min; 40 cycles of 95 °C for 30 s and 61 °C for 60 s; 1 cycle of 4 °C for 5 min; 1 cycle of 90 °C for 5 min and a brief hold at 4 °C |

**Supplemental Table S6.** Methylation-independent PCR primers, fluorescence probes, reaction mixture and PCR conditions used for tissue-specific methylation-based gdcfDNA quantification.

| Assay                                                                                                                                                                   | Target                    | Primers                                                                                                  | Sequence (5'-3')                                                        |
|-------------------------------------------------------------------------------------------------------------------------------------------------------------------------|---------------------------|----------------------------------------------------------------------------------------------------------|-------------------------------------------------------------------------|
| Tissue-specific DNA methylation                                                                                                                                         | <i>PTK2B</i>              | Forward primer                                                                                           | TAGTTTTCGGAGTNGTTGTATATTTATTTG                                          |
|                                                                                                                                                                         | <i>PTK2B</i>              | Reverse primer                                                                                           | CGAACTCCAACNACTACTCCTC                                                  |
| Assay                                                                                                                                                                   | Target                    | Probes                                                                                                   | Sequence                                                                |
| Tissue-specific DNA methylation                                                                                                                                         | <i>Methylated PTK2B</i>   | Methylated target probe                                                                                  | 5'-FAM-TTGT <u>C</u> GT <u>C</u> GTTT <u>C</u> GGTT-MGB-3'              |
| Tissue-specific DNA methylation                                                                                                                                         | <i>Unmethylated PTK2B</i> | Unmethylated target probe                                                                                | 5'-HEX-TTTGT <u>T</u> GT <u>T</u> GT <u>T</u> TTT <u>T</u> GGTTA-MGB-3' |
| Reaction Mixture                                                                                                                                                        |                           | ddPCR conditions                                                                                         |                                                                         |
| PCR-grade water, 11µL QX200 ddPCR Supermix for Probes (Bio-Rad), 450nM F primer, 450 nM R primer, 250nM Methylated Probe, 250nM Unmethylated Probe & 8 uL DNA template. |                           | 1 cycle of 95°C for 10 min; 45 cycles of 94°C for 15s then 56.5°C for 60 s; 98°C for 10 min; 4°C storage |                                                                         |
